# Supplementary figures and images for: Expanding Patient Access to Investigational New Drugs: Overview of Intermediate and Widespread Treatment Investigational New Drugs, and Emergency Authorization in Public Health Emergencies
Source: PubMed Central journal article supplement — JACC Basic Transl Sci. 2018 Jun 25;3(3):403–14. doi: 10.1016/j.jacbts.2018.02.001 (PMC6058931; doi:10.1016/j.jacbts.2018.02.001), 2018-06-25

|                         | 2010 | 2011 | 2012 | 2013 | 2014 |
|-------------------------|------|------|------|------|------|
| Drug Intermediate       | 2    | 0    | 14   | 27   | 50   |
| Drug Widespread         | 0    | 1    | 0    | 0    | 0    |
| Biological Intermediate | 1    | 4    | 1    | 8    | 1    |
| Biological Widespread   | 0    | 1    | 2    | 0    | 1    |

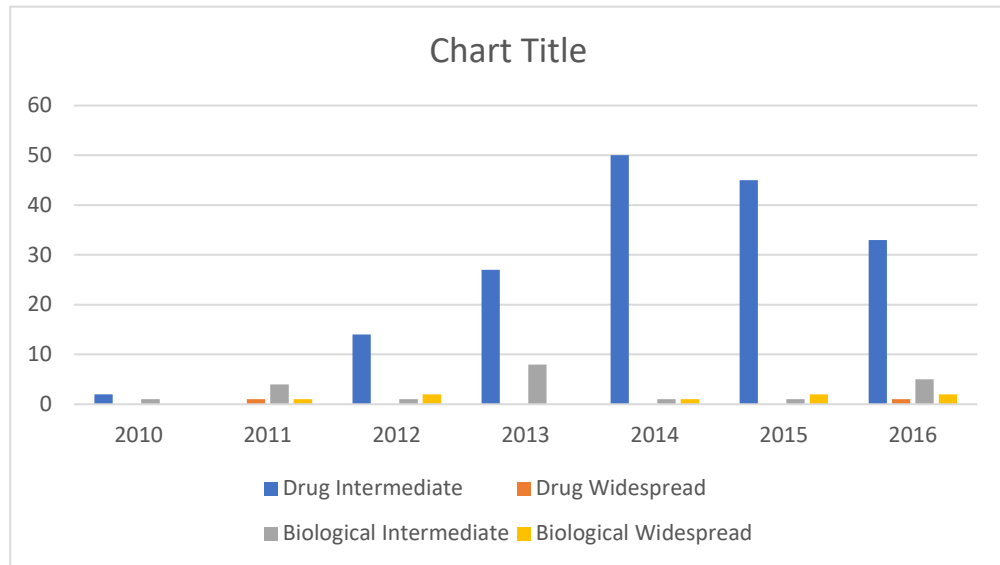

| 2015 | 2016 |
|------|------|
| 45   | 33   |
| 0    | 1    |
| 1    | 5    |
| 2    | 2    |

Supplement: mmc1.pdf [file mmc1.pdf]
